# Supplementary material
Source: PubMed Central journal article supplement (PMC4732224)
Supplement: 10.1074_M115.666909_jbc.M115.666909-1.pdf [file 10.1074_M115.666909_jbc.M115.666909-1.pdf]

**Figure S1** - EC<sub>50</sub> values of ARN398 or ARN14988 (20μM, n=4) in combination with various chemotherapeutic drugs on G361 cell viability.

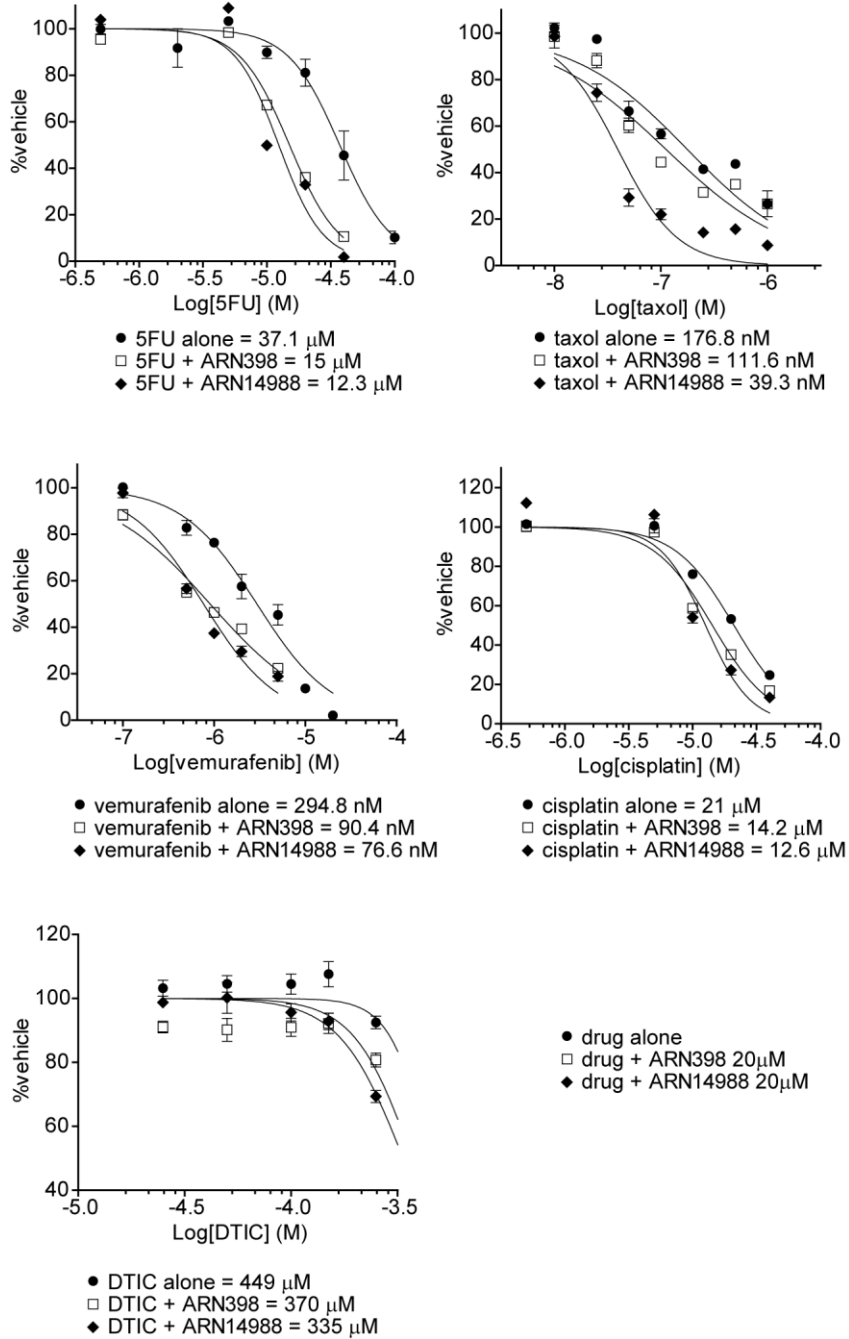

**Table S1** - Combinatory index of ARN14988 (20 $\mu$ M) in association with various concentrations of chemotherapeutic drugs. The effects of single drugs or drug combinations are reported as percentage of reduction in cell viability/100 (effect) compared to vehicle.

| <b>5FU (<math>\mu</math>M)</b>         | <b>Effect</b> | <b>ARN14988 (<math>\mu</math>M)</b> | <b>Effect combo</b> | <b>CI</b> |
|----------------------------------------|---------------|-------------------------------------|---------------------|-----------|
| 5                                      | 0.03          | 20.0                                | 0.577               | 0.2467    |
| 10                                     | 0.074         | 20.0                                | 0.591               | 0.2553    |
| 20                                     | 0.1           | 20.0                                | 0.592               | 0.2891    |
| <b>Taxol (<math>\mu</math>M)</b>       | <b>Effect</b> | <b>ARN14988 (<math>\mu</math>M)</b> | <b>Effect combo</b> | <b>CI</b> |
| 0.025                                  | 0.026         | 20.0                                | 0.256               | 0.8540    |
| 0.05                                   | 0.341         | 20.0                                | 0.715               | 0.3494    |
| 0.1                                    | 0.418         | 20.0                                | 0.764               | 0.4608    |
| 0.25                                   | 0.591         | 20.0                                | 0.849               | 0.6697    |
| <b>Vemurafenib (<math>\mu</math>M)</b> | <b>Effect</b> | <b>ARN14988 (<math>\mu</math>M)</b> | <b>Effect combo</b> | <b>CI</b> |
| 0.5                                    | 0.197         | 20.0                                | 0.589               | 0.3134    |
| 1                                      | 0.237         | 20.0                                | 0.651               | 0.3195    |
| 2                                      | 0.461         | 20.0                                | 0.649               | 0.4535    |
| 5                                      | 0.553         | 20.0                                | 0.868               | 0.2147    |
| <b>Cisplatin (<math>\mu</math>M)</b>   | <b>Effect</b> | <b>ARN14988 (<math>\mu</math>M)</b> | <b>Effect combo</b> | <b>CI</b> |
| 5                                      | 0.083         | 20.0                                | 0.499               | 0.6136    |
| 10                                     | 0.27          | 20.0                                | 0.557               | 0.8507    |
| 20                                     | 0.677         | 20.0                                | 0.789               | 0.8812    |
| <b>DTIC (<math>\mu</math>M)</b>        | <b>Effect</b> | <b>ARN14988 (<math>\mu</math>M)</b> | <b>Effect combo</b> | <b>CI</b> |
| 100                                    | 0.01          | 20.0                                | 0.1                 | 1.3593    |
| 250                                    | 0.073         | 20.0                                | 0.342               | 0.8364    |
| <b>Tamoxifen (<math>\mu</math>M)</b>   | <b>Effect</b> | <b>ARN14988 (<math>\mu</math>M)</b> | <b>Effect combo</b> | <b>CI</b> |
| 2                                      | 0.365         | 20.0                                | 0.467               | 1.1374    |
| 5                                      | 0.872         | 20.0                                | 0.878               | 1.1665    |
| 10                                     | 0.99          | 20.0                                | 0.99                | 0.9647    |
